# Supplementary material for: Identification of differentially expressed key genes between glioblastoma and low-grade glioma by bioinformatics analysis
Source: PubMed Central journal article supplement (PMC6409090; doi:10.7717/peerj.6560), 2019-03-07

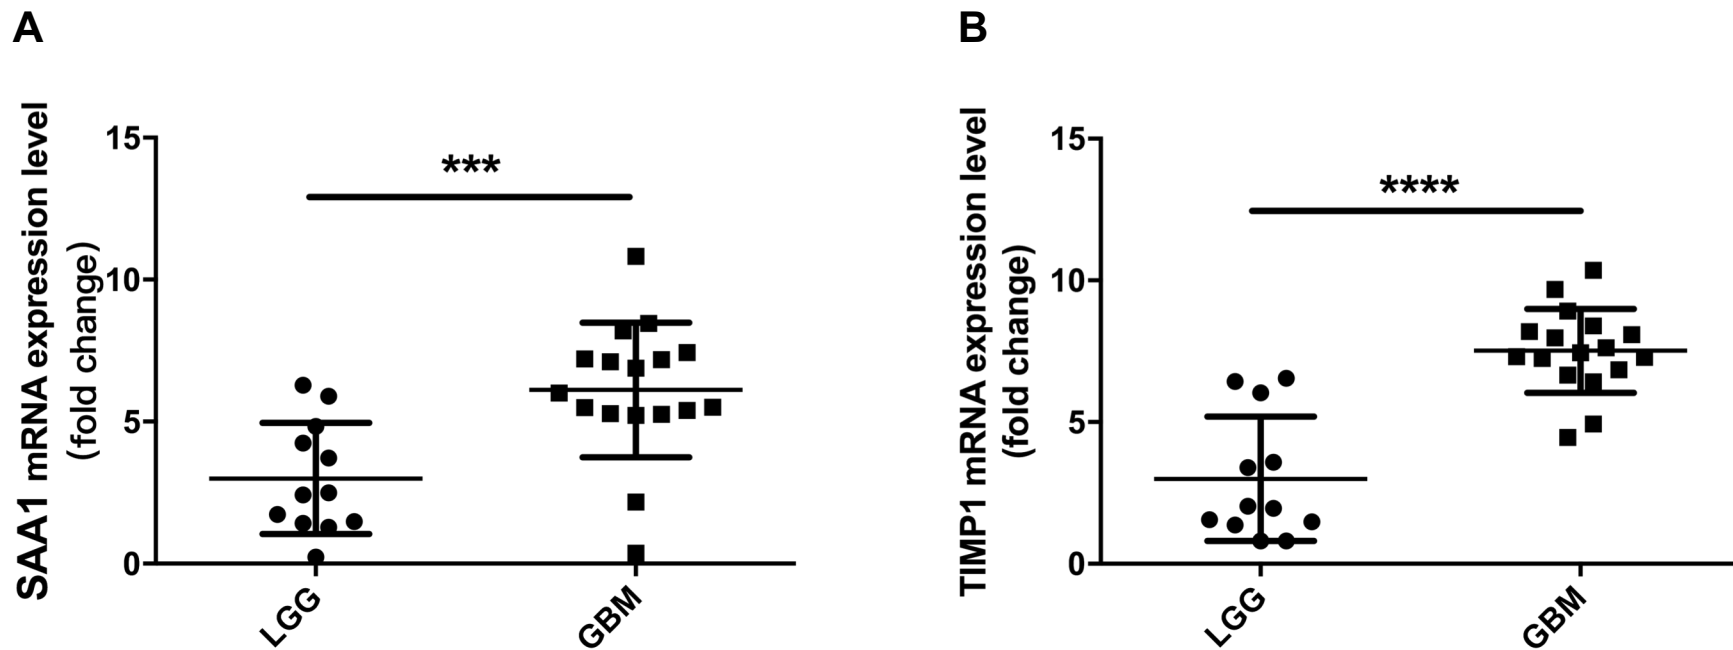

Supplement: peerj-07-6560-s002.pdf [file peerj-07-6560-s002.pdf]
